# Supplementary material for: Short‐term lung function changes predict mortality in patients with fibrotic hypersensitivity pneumonitis
Source: PubMed Central journal article supplement (PMC9302621; doi:10.1111/resp.14204), 2022-01-12
Supplement: RESP-27-202-s001.pdf [file RESP-27-202-s001.pdf]

# Short-term lung function changes predict mortality in patients with fibrotic hypersensitivity pneumonitis

## METHODS

- 145 consecutive patients with fibrotic hypersensitivity pneumonitis (HP) (Jan 2010 - Dec 2014)
- Lung function measurements at baseline and at 12 months (range 6–18 months)
- Impact of short term (1 year) marginal lung function decline on mortality
  - FVC  $\geq 5\%$
  - DLCO  $\geq 10\%$

## RESULTS

Mortality according to FVC decline  $\geq 5\%$

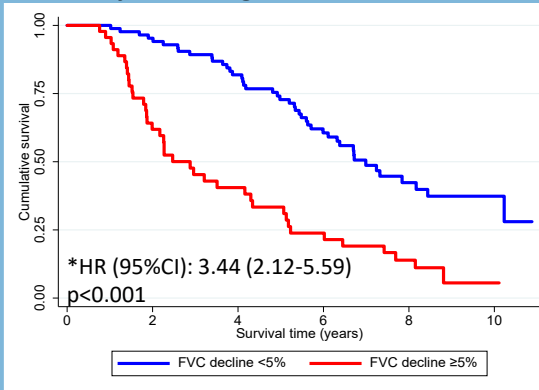

Mortality according to DLCO decline  $\geq 10\%$

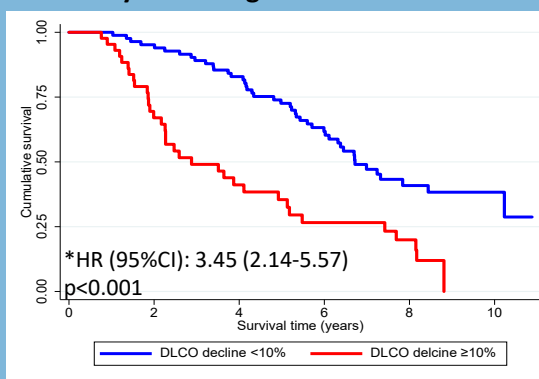

\*Multivariable analysis correcting for age, ethnicity, treatment (active vs no treatment) presence of honeycombing on CT, and baseline disease severity (CPI)

## SUMMARY

- Decline in FVC  $\geq 5\%$  or DLCO  $\geq 10\%$  within the 1<sup>st</sup> year were robustly predictive of mortality in fibrotic HP
- This finding remained strongly significant regardless of baseline demographics and disease severity, treatment, pulmonary hypertension and BAL lymphocytosis
- In fibrotic HP, even a marginal decline in FVC  $\geq 5\%$  or in DLCO  $\geq 10\%$  despite appropriate management, is likely to be associated with an IPF-like outcome
